1  
2  
3  
4  
5  
6  
7  
8  
9  
10  
11  
12  
13  
14  
15  
16  
17  
18  
19  
20

Prediction of Optimal Growth Temperature using only Genome Derived Features

David B. Sauer<sup>1\*</sup> and Da-Neng Wang<sup>1\*</sup>

<sup>1</sup>Department of Cell Biology, and The Helen L. and Martin S. Kimmel Center for Biology and Medicine, Skirball Institute of Biomolecular Medicine, New York University School of Medicine, New York, New York, United States of America

\*Corresponding authors

E-mail: [david.sauer@med.nyu.edu](mailto:david.sauer@med.nyu.edu) (D.B.S), [da-neng.wang@med.nyu.edu](mailto:da-neng.wang@med.nyu.edu) (DN.W.)

## 21 **Abstract**

22 Optimal growth temperature is a fundamental characteristic of all living organisms. Knowledge  
23 of this temperature is central to the study the organism, the thermal stability and temperature  
24 dependent activity of its genes, and the bioprospecting of its genome for thermally adapted  
25 proteins. While high throughput sequencing methods have dramatically increased the availability  
26 of genomic information, the growth temperatures of the source organisms are often unknown.  
27 This limits the study and technological application of these species and their genomes. Here, we  
28 present a novel method for the prediction of growth temperatures of prokaryotes using only  
29 genomic sequences. By applying the reverse ecology principle that an organism's genome  
30 includes identifiable adaptations to its native environment, we can predict a species' optimal  
31 growth temperature with an accuracy of 4.69 °C root-mean-square error and a correlation  
32 coefficient of 0.908. The accuracy can be further improved for specific taxonomic clades or by  
33 excluding psychrophiles. This method provides a valuable tool for the rapid calculation of  
34 organism growth temperature when only the genome sequence is known.

35

## 36 **Author Summary**

37 The optimal growth temperature is a fundamental characteristic of all living organisms. It is the  
38 temperature at which the organism grows at the greatest rate, and is a consequence of  
39 adaptations of that organism to its native environment. These adaptations are contained within  
40 the genome of the organism, and therefore species from varying environments have distinct  
41 genomic characteristics. Here we use those genomic characteristics to predict a species'  
42 optimal growth temperature. This provides a novel tool for describing a key parameter of the  
43 species' native environment when it is otherwise unknown. This is particularly valuable as the  
44 rate of genome sequencing has increased, while the determination of growth temperature  
45 remains laborious.

46

## 47 **Introduction**

48 Growth conditions of an organism are essential to its characterization. However, these values  
49 may be unknown in organisms which are difficult to culture, “unculturable”, or otherwise poorly  
50 characterized. Reverse ecology posits that the evolutionary effects of an organism’s native  
51 environment is reflected by adaptations in its genome [1]. Therefore, an organism’s native  
52 environment can be identified by comparing its genome to the genomes of other organisms from  
53 a range of environments. Notably, this is done without experimental manipulation or  
54 interrogation of the organism beyond genome sequencing. Such reverse ecology strategies  
55 have been successful in studying adaptation to soil conditions [2], salinity [3], and temperature  
56 [4].

57

58 Of these environmental pressures, temperature, being a description of the internal energy of the  
59 environment, is a particularly strong driving force for adaptation. Prokaryotes are often viable  
60 over a range of temperatures, which varies by species. For a particular organism, increasing  
61 temperature beyond it’s growth range, corresponding to increased internal energy, can lead to  
62 loss of protein and nucleic acid structure. Conversely, a sub-optimal temperature leads to  
63 reduced enzyme kinetics and stiffening lipid membranes. Each of these biological  
64 consequences may be deleterious to un-adapted organisms. Therefore, it is perhaps not  
65 surprising that an organism’s optimal growth temperature (OGT) correlates to quantifiable  
66 properties (features) in the organism’s nucleotide and protein sequences. Features correlated  
67 with OGT can be identified in the genomic [5], tRNA [6,7], rRNA [6–8], open reading frame  
68 [9,10], and in the proteomic sequences [10–13]. Correlations between OGT and tRNA G+C  
69 content [6,7] or the charged versus polar amino acid ratios [14] are well known.

70

71 Clearly, OGT is a necessary parameter for analyzing physiological processes of an organism or  
72 activities of its genes and proteins. [15,16]. However, the experimental determination of OGT is  
73 laborious [17,18], and sometimes unattainable [19]. Also, recorded OGT or environmental  
74 temperature may be inconsistently measured, particularly in genetic samples not obtained from  
75 pure culture [20]. Further, for metagenomic samples the conditions during collection may  
76 significantly differ from the originating species' growth environment. This can be due to the  
77 organism or its genetic material being found distant from its originating environment [21], or the  
78 collected genomic material may be from organisms which are inviable [22]. Even in pure culture  
79 in the laboratory, the experimental growth conditions can vary greatly [23] and may not be at the  
80 source organisms' OGT [24].

81  
82 While many previous studies have aimed to identify genes and proteins [25], mutations [16], and  
83 mechanisms [15] that drive thermal adaptation, there is also great value in using these adaptive  
84 differences to provide data of an organism's native environment when it may not be otherwise  
85 known or well-described. A number of parameters have been identified which correlate with  
86 OGT [14]. However, those correlations are often weak and therefore of limited predictive value  
87 alone. Here, we aim to predict a prokaryotic species' OGT only from its genomic sequence. We  
88 set out to develop a novel tool for the ecological characterization of a species based solely on its  
89 genome, the study of thermoadaptation, and bioprospecting for thermoadapted genes.

90

## 91 **Results**

### 92 **Prokaryote genome redundancy is highly skewed**

93 Of the initial 8270 prokaryotic species with a reported OGT, genome sequences were available  
94 for 2708 species. These sequenced species were composed of 2538 Bacteria and 170  
95 Archaea, with OGTs ranging from 4 to 103 °C. A total of 36,721 sequenced genomes for these

96 species were downloaded, indicating multiple genomes for each species on average. However,  
97 the number of genomes per species was highly skewed, with great redundancy for model  
98 organisms and pathogens (Fig S1C). To avoid having these relatively few species dominate the  
99 analysis, features were averaged by species and all regressions were done by species rather  
100 than by genome.

101

### 102 **Individual genome derived features correlate with OGT**

103 Based on the reverse genomics principle that an organism's adaptation to its environment is  
104 reflected within its genome, we hypothesize that a species' OGT could be predicted based on  
105 characteristics of its genome and genome derived sequences. This hypothesis was supported  
106 by previous noted correlations between OGT and individual features of the genomic [5,6,26],  
107 tRNA [6,7], rRNA [6–8], open reading frame [7,9,10,27,28], and proteomic or protein sequences  
108 [10–14,29–35]. These features are quantifiable properties of the sequence, such as G+C  
109 content, length, and nucleotide or amino acid fraction. Of the features calculated, 42 were found  
110 in this work to be correlated with OGT in the present dataset by the Pearson correlation  
111 coefficient with  $|r| > 0.3$  (Fig 1, Table S1). However, these correlations to OGT were often weak  
112 and therefore insufficient for the calculation of a species' growth temperature. Furthermore,  
113 there was a strong association among many features (Fig S2). We therefore decided to consider  
114 them simultaneously, using multiple linear regression, with features added individually to  
115 minimize multicollinearity. We started by classifying features based on the source sequences  
116 (genomic, tRNA, rRNA, open reading frames, and proteome). Multiple linear regressions were  
117 calculated, progressively increasing the number of feature classes used in the regression.

118

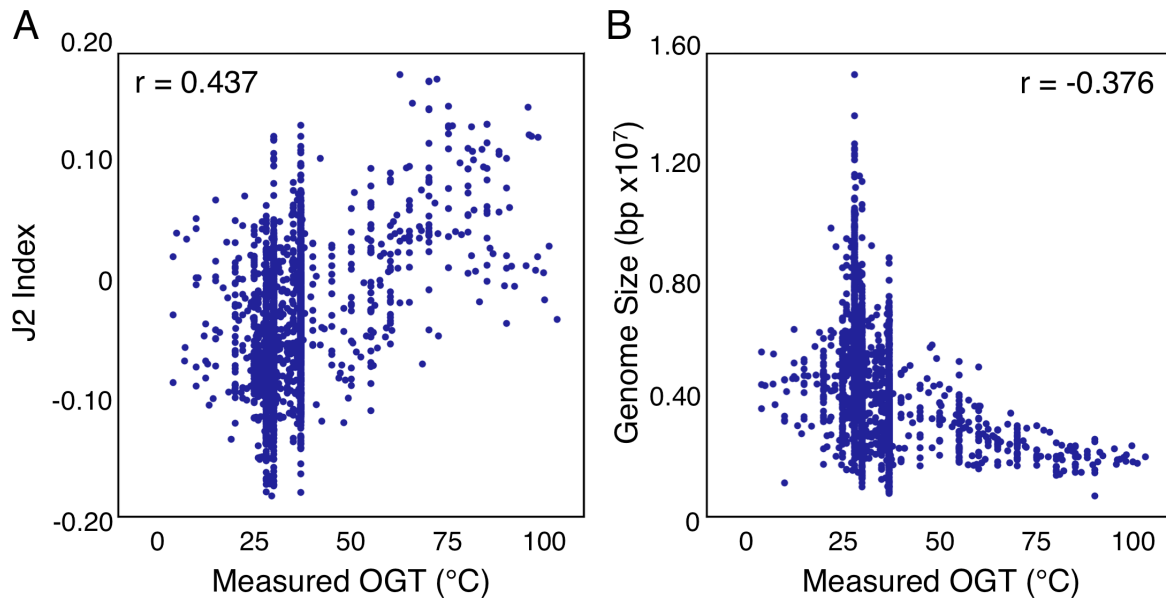

119

120

121 Figure 1. Individual genome derived features correlate weakly with the originating species' OGT.

122 Measure optimal growth temperature for each species versus J2 index of genomic dinucleotide

123 fractions (A) and total genome size (B).

124

125 **A regression using only genomic sequence based features is weakly predictive**

126 **of OGT**

127 The genomic sequence provides information about the nucleotide content, nucleotide order, and

128 chromosomal structure of an organism's heritable genetic material. In the absence of any

129 other knowledge, this sequence still reflects adaptations to the particular thermal environment of

130 the organism. For example, total genome size has been shown to be negatively correlated with

131 a species' OGT [26]. Accordingly, it has been proposed that the reduced time and energy of

132 genomic replication offers selective advantages at higher temperatures. Additionally, the

133 necessity of maintaining genomic structure with increased temperature is thought to be reflected

134 in a species' genomic dinucleotide fractions [36], which is quantified in the J2 index [5].

135

136 In the present dataset, individual nucleotide and dinucleotide fractions of the genome, the J2  
137 index, the G+C content, and total size were calculated for each genome. Of these features, the  
138 J2 index, genome size, and the CT and AG dinucleotide fractions correlated with OGT, but only  
139 weakly. Using these poorly correlated and collinear input features for regression, the resulting  
140 multiple linear regression is poor at predicting OGT with a root mean squared error (RMSE) of  
141 9.86 °C ( $r = 0.469$ ) (Fig S3).

142

### 143 **tRNA and rRNA sequences improve OGT prediction**

144 tRNA and rRNA are nucleic acids whose structure, and enzymatic activity in the case of rRNA,  
145 are essential to cell viability. Therefore, the direct correlation of OGT to G+C content of tRNAs  
146 [6,7] and rRNAs [8,37] is thought to reflect the necessary increase in base pair hydrogen  
147 bonding needed to maintain the structure of these nucleic acids at elevated temperatures. While  
148 a subset of the previously analyzed genomic sequence, we hypothesized that features derived  
149 from these tRNA and rRNA sequences might be more strongly correlated with OGT. To this  
150 end, we identified their sequences bioinformatically. tRNA and 16S rRNA sequences were  
151 identified in 100% and 98% of the species respectively, reflecting the highly conserved nature of  
152 these genes.

153

154 Using these identified tRNA and rRNA sequences, nucleotide fractions and G+C content were  
155 calculated for each. All calculated features for tRNA and rRNA sequences were correlated with  
156 OGT. Calculating a new linear regression with the OGT using tRNA features, in addition to  
157 genomic features, improved accuracy (RMSE = 7.30 °C,  $r = 0.757$ ) (Fig 2A). Similarly, a  
158 regression calculated with rRNA and genomic features also improved accuracy (RMSE = 6.99  
159 °C,  $r = 0.784$ ) (Fig 2B). By using all available tRNA, rRNA, and genomic features, a still more  
160 accurate linear regression was calculated (RMSE = 6.71 °C,  $r = 0.802$ ) (Fig 2C).

161

162

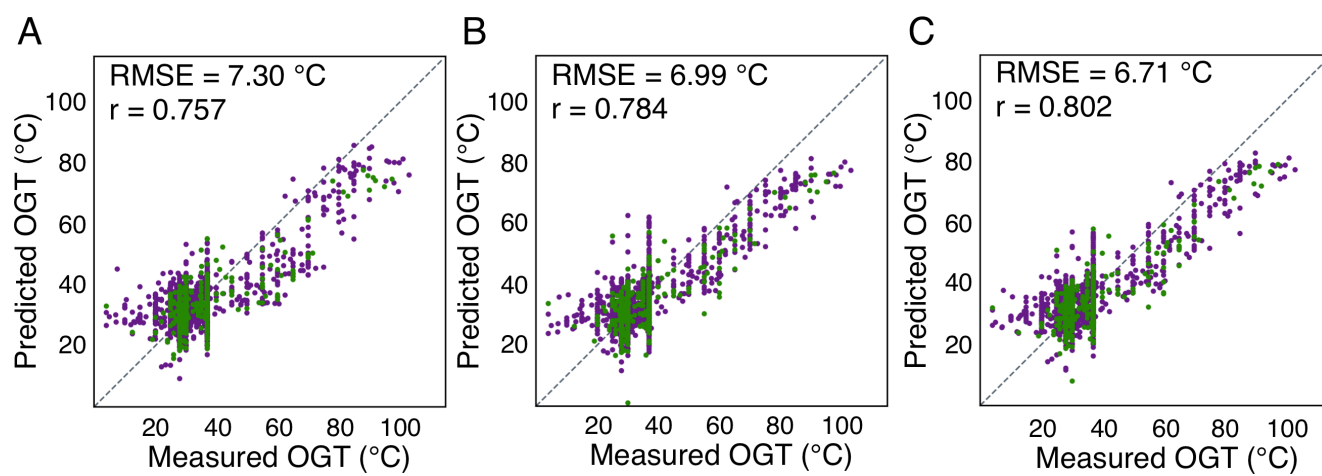

163

164 Figure 2. Using genomic and genic sequences improve OGT prediction accuracy. Predicted  
165 versus measured OGT for each species, using linear regressions with features derived from  
166 genomic and (A) tRNA, (B) rRNA, or (C) tRNA and rRNA sequences. Species used for  
167 regression and evaluation are shown in purple and green, respectively. The dotted line indicates  
168 a perfect prediction.

169

### 170 **ORF sequences improve OGT prediction**

171 As tRNA and rRNA features clearly improve the ability to predict a species' OGT, we examined  
172 if other gene sequences might also improve the regression. In particular open reading frames,  
173 which code for proteins but exclude the non-coding regions of the genome, were considered.  
174 We hypothesized that using coding regions alone would increase sensitivity to changes in OGT.  
175 Additionally, codon biases have previously been reported to correlate with OGT [13], likely  
176 reflecting both amino acid differences and the necessity of maintaining proper codon-anticodon  
177 pairing in differing thermal environments. Furthermore, the greater number of ORFs in a  
178 genome, relative to tRNAs and rRNAs, make the features of ORFs less sensitive to single gene



179 aberrations or mispredictions. Therefore, ORF derived features were hypothesized to more  
180 sensitively and accurately report on the thermal environment than tRNA or rRNA sequences.

181  
182 We identified ORFs within the genomic sequences bioinformatically. From these ORFs, a  
183 number of derived features were calculated including nucleotide and dinucleotide fractions,  
184 codon fractions, start and stop codon fractions, the coding ratio and fraction of the genome, the  
185 ORF density of the genome, G+C and A+G content, and average length. Of these, nine were  
186 found to be correlated with OGT. These include the A+G content, codon and dinucleotide  
187 fractions, and the fraction of the alternative start codon TTG. These ORF derived features, in  
188 addition to the genomic, tRNA, and rRNA features, were used to calculate a new multiple linear  
189 regression with significantly improved accuracy (RMSE = 5.77 °C,  $r = 0.857$ ) (Fig 3).

190

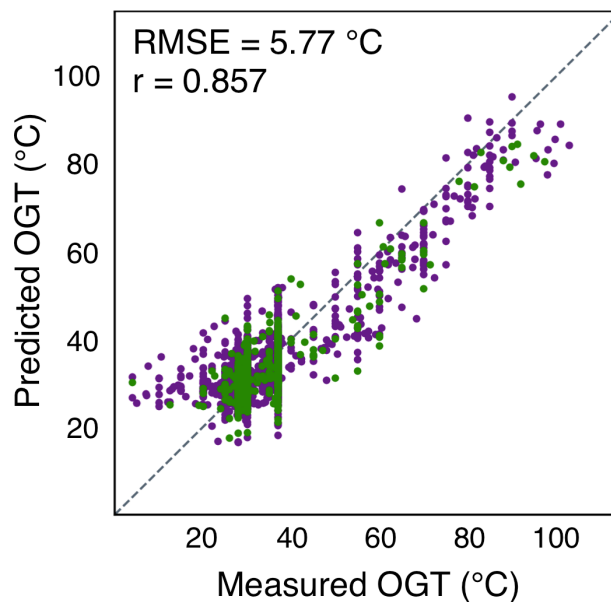

191

192

193 Figure 3. Open reading frame sequences further improve OGT prediction accuracy. Predicted  
194 versus measured OGT for each species, using a linear regression with features derived from

195 genomic, tRNA, rRNA, and ORF sequences. Species used for regression and evaluation are  
196 shown in purple and green, respectively. The dotted line indicates a perfect prediction.

197

### 198 **Including proteome features significantly improves OGT prediction**

199 While ORF feature correlation to OGT partially reflects the adaptation of the coding regions and  
200 mRNAs to the thermodynamic environment, it has been suspected that this correlation also  
201 reflected adaptations in each species' proteome to OGT. Temperature is known to correlate with  
202 protein folding, biochemistry, and enzyme kinetics, all of which are essential to organismal  
203 viability [10,14,32]. Based on these biological consequences, proteome derived features were  
204 hypothesized to be especially sensitive to thermal environment. Therefore, the proteome was  
205 translated from each species' ORFs, and features calculated from the proteome's primary  
206 sequence. These features included amino acid fractions, the fraction of the proteome to be  
207 charged or thermolabile, and the EK/QH, LK/Q, Polar/Charged, and Polar/Hydrophobic amino  
208 acid ratios.

209

210 Supporting this hypothesis, proteome derived features were found to have the strongest  
211 correlation to OGT (Table S1), with the greatest correlation being the fraction of the proteome  
212 composed of the amino acids ILVWYGERKP [13]. The linear regression of OGT using proteome  
213 features, in addition to previously described features, significantly improved accuracy (RMSE =  
214 4.69 °C,  $r = 0.908$ ). (Fig 4, Eq S1).

215

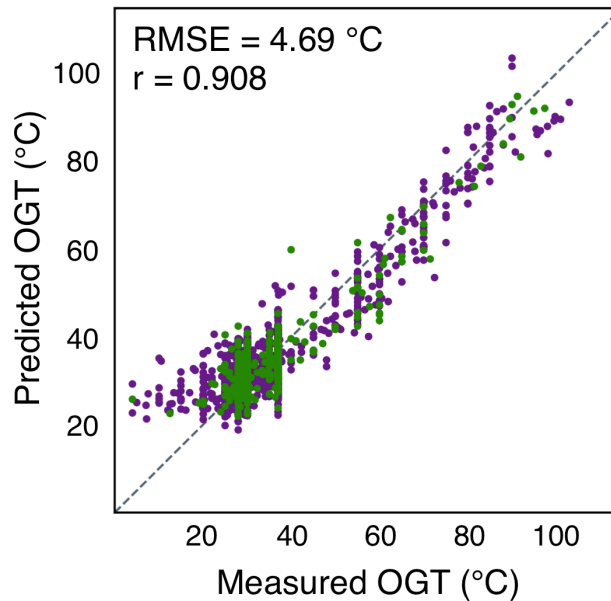

216

217

218 Figure 4. Proteome derived features significantly improve OGT prediction accuracy. Predicted  
219 versus measured OGTs for each species, using a linear regression with features derived from  
220 genomic, tRNA, rRNA, ORF, and proteome sequences. Species used for regression and  
221 evaluation are shown in purple and green, respectively. The dotted line indicates a perfect  
222 prediction.

223

#### 224 **Taxonomic clade specific regressions are the most accurate**

225 The regressions described up to this point were all made using all prokaryotic species.  
226 However, we had noted that the number of individual features correlated with OGT was much  
227 higher in Archaea than Bacteria (Table S1). In addition, we hypothesized that the magnitude of  
228 the response of each feature to OGT may be distinct in each superkingdom.

229

230 Based on these distinctions, we tested whether superkingdom specific regressions would be  
231 more accurate than the regression of all prokaryotes (Fig. 5). Using the NCBI taxonomic  
232 assignment for each species, an Archaea-only regression dramatically improved accuracy for

233 these species (RMSE = 3.21 °C,  $r = 0.995$ ) (Eq S2). However, the Bacteria-only regression only  
234 showed only a slight improvement (RMSE = 4.61 °C,  $r = 0.816$ ) (Eq S3). This likely reflects bias  
235 of the general prokaryotic regression, due to the numerical majority of bacterial species and the  
236 greater diversity of bacterial species.

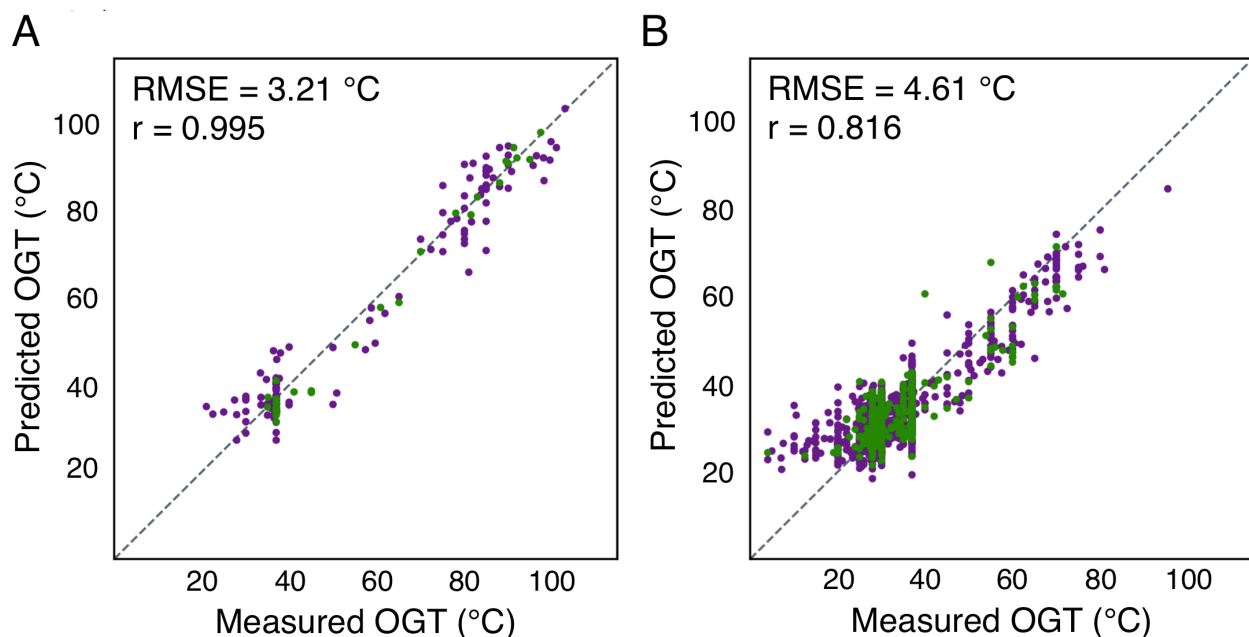

237  
238  
239 Figure 5. Taxon specific linear regressions are most accurate. Predicted versus measured OGT  
240 for each species using superkingdom specific linear regressions for Archaea (A) and Bacteria  
241 (B). Species used for regression and evaluation are shown in purple and green, respectively.  
242 The dotted line indicates a perfect prediction.

243  
244 Addressing this diversity in bacteria, the taxonomic specific regression can be further improved  
245 when the data is separated by phylum or class. OGT regression was limited to clades where the  
246 number of species (N) was greater than 50 to ensure the significance of the regression. Of the  
247 individual phyla, the most accurate regressions are found in the *Firmicutes* (RMSE = 4.88 °C,  $r$   
248 = 0.831), *Actinobacteria* (RMSE = 2.90 °C,  $r = 0.818$ ), *Bacteroidetes* (RMSE = 1.58 °C,  $r =$

249 0.964), and *Euryarchaeota* (RMSE = 4.00 °C,  $r = 0.985$ ) (Fig S4). In contrast, the *Proteobacteria*  
250 regression had much more weakly correlated predicted and reported OGTs (RMSE = 4.10 °C,  $r$   
251 = 0.569), though the small RMSE likely reflects the narrow OGT range of this phylum. Further  
252 subdivision of the *Proteobacteria* into classes (Fig S5) resulted in significant correlation of the  
253 *Betaproteobacteria* (RMSE = 2.94 °C,  $r = 0.789$ ), and *Deltaproteobacteria* regressions (RMSE =  
254 2.04 °C,  $r = 0.761$ ). However, no correlation was found in regressions for the *Proteobacteria*  
255 classes of *Alphaproteobacteria* or *Gammaproteobacteria*.

256

## 257 **Discussion**

258 Knowing an organism's optimal growth characteristics is central to addressing basic biological  
259 questions about how organisms adapt to a particular environmental niche. Further, the  
260 systematic study of adaptation often requires the optimal growth conditions of the species of origin  
261 for each species and gene or protein examined. Additionally, proteins from organisms adapted  
262 to particular environmental niches are often particularly suited for structural biology [38–40] and  
263 industrial applications [41,42].

264

265 However, if the growth characteristics of already sequenced organisms are uncharacterized, the  
266 physiochemical properties of these genes that otherwise might be inferred are lost [20].  
267 Consequently, this limits the use of these genomes in academic study and mining for  
268 biotechnology applications. Exacerbating this issue, high throughput sequencing has enabled  
269 rapid growth in the number of available genomic, metagenomic, and derived proteomic  
270 sequences. This growth in genetic information is likely to outpace the laborious experimental  
271 task of characterizing the growth conditions of each species, leading to an increasing number of  
272 genomic sequences with unknown growth characteristics. This is already apparent by those

273 organisms which have been ‘unculturable’ to date, but which have been sequenced by  
274 metagenomics.

275

276 To satisfy the need for growth condition data when only genomic sequences are available, here  
277 we demonstrate a novel reverse ecology tool to accurately predict the OGT using solely the  
278 genomic sequence as input. Our method can predict the OGT for sequenced Archaea and  
279 bacteria with an accuracy of 3.21 °C and 4.61 °C, respectively.

280

### 281 **OGT can be accurately predicted using only genome derived parameters**

282 Genome classification is clearly essential to the most accurate prediction of OGT. The programs  
283 used for tRNA, rRNA, and ORF identification all require some level of taxonomic classification.  
284 When applying the general prokaryotic regression, this is only requires the relatively simple  
285 exclusion of eukaryotic samples prior to sequencing [43]. However, the most accurate OGT  
286 regressions are taxon specific, and therefore genomic samples require further classification.  
287 This assignment is routinely addressed *in silico*, using specialized bioinformatic tools which can  
288 easily assign taxonomic clade to genomic material [44,45].

289

290 As a simple proof-of-concept, the prokaryotic genomes were also classified by superkingdom  
291 using the best scoring 16S rRNA hidden Markov model in Barrnap (Fig S6). These regressions  
292 were of similar accuracy to those using NCBI superkingdom assignments.

293

### 294 **Excluding genome size does not alter the regression accuracy**

295 While prokaryote genome size is strongly correlated with OGT, it is unique among all features  
296 used here in requiring a complete genome for calculation. Therefore, this feature might not be  
297 available in metagenomic samples, or otherwise incompletely assembled genomes. Excluding

298 this feature has only a minor impact on the regression for all prokaryotes (RMSE = 5.07 °C,  $r =$   
299 0.891), or the separate regressions for Bacteria (RMSE = 4.97 °C,  $r = 0.783$ ), or Archaea  
300 (RMSE = 3.21 °C,  $r = 0.995$ ) (Fig S7).

301  
302 **Psychrophiles are poorly fit**

303 While the final regressions of prokaryotes and Bacteria were generally accurate, species with  
304 optimal growth temperatures less than approximately 25 °C are clearly poorly fit. This outcome  
305 is unsurprising, as few psychrophilic sequences are present in the dataset (Fig. S1), and the  
306 mechanisms of thermoadaptation to higher and lower temperatures are not equivalent [46].  
307 Excluding those species with an OGT of less than 25 °C yields a slightly better general  
308 prokaryotic regression (RMSE = 4.42 °C,  $r = 0.916$ ) (Fig. S6). The archaeal regression was  
309 slightly worse (RMSE = 3.12 °C,  $r = 0.993$ ), while the bacterial regression improved (RMSE =  
310 4.26 °C,  $r = 0.832$ ), reflecting the known OGT ranges of each superkingdom.

311  
312 **Improvements over comparable methods**

313 Our method significantly expands and improves upon the individual features previously  
314 described to correlate with OGT. By studying a much larger set of genomes, a more precise  
315 correlation between each feature and OGT can be calculated. Further, by using multiple  
316 features, more accurate and predictive regression models have been calculated. Notably, our  
317 method improves on previously reported analyses requiring particular genes being present in  
318 the genome, thereby making the method more general in application [47]. Also, this method  
319 quantitatively predicts an OGT rather than using classification (psychrophile, mesophile,  
320 thermophile, or hyperthermophile). This improves on methods which predict OGT ranges [47–  
321 50], where classification necessarily limited accuracy.

322

323 The most comparable method is reported by Zeldovich *et al.* calculating OGT from the proteome  
324 as  $OGT = 937F - 335$ , where F is the sum of the proteome fraction for the amino acids  
325 IVYWREL [13]. Using the current larger dataset, we calculate a lower correlation ( $r = 0.726$ ) and  
326 accuracy (RMSE = 10.5 °C) than previously reported. This is likely a consequence of more  
327 genomic sequences being available, and our keeping of individual species separate rather than  
328 averaging those with the same OGT. By considering more features derived from the source  
329 organism's genome, the prokaryotic regression presented here clearly advances upon this  
330 previous method improving in both correlation and accuracy. While we focus on growth  
331 temperature, the same principle could be readily applied to other quantifiable characteristics of  
332 an organism's optimal growth environment, such as pH, salinity, osmolarity, or oxygen  
333 concentration.

334

### 335 **Application and validation**

336 Applying these regressions, we predicted OGTs for those species with a genomic sequence  
337 available, but without a reported OGT in Sauer *et al.* (2015), using the most taxon specific linear  
338 regression available. Only the *Betaproteobacteria* and *Deltaproteobacteria* classes of  
339 *Proteobacteria* were predicted, excluding the *Alphaproteobacteria*, *Gammaproteobacteria*, and  
340 other *Proteobacteria* due to the poor predictive values of those taxon specific regressions. In  
341 total, 482 species' OGTs were predicted (Table S2). Of the species with newly predicted OGTs,  
342 a more recent literature search revealed reported OGTs for 36 species [51–87]. The predicted  
343 and measured OGTs were strongly correlated (RMSE = 6.94 °C,  $r = 0.857$ ), validating the  
344 predictive value of this method (Fig S9).

345

### 346 **Materials and Methods**

#### 347 **Source data and sequence extraction**



348 Experimentally measured OGTs of various prokaryotic species were used as previously  
349 published without modification [88]. Taxonomic assignments for each species were collected  
350 from NCBI [89]. All available top level genome sequences for each species were downloaded  
351 from Ensembl [90]. tRNA sequences were identified with tRNAScan-SE 1.3.1 [91] with general  
352 settings. Ribosomal RNA genes were identified with Barrnap 0.8 [92] using superkingdom  
353 specific hidden Markov models, and rRNA sequences extracted from the genome using  
354 BEDtools 2.26.0 [93]. Open reading frame sequences were identified with GenemarkS 4.32 [94]  
355 using the default settings. ORFs were also translated into protein sequences using the standard  
356 genetic code. Features were calculated for each genome and derived proteome, ignoring  
357 ambiguous nucleotides and amino acids. All calculated features were averaged by species.  
358 Twenty percent of the species with available genomes were set aside as a test set and never  
359 used for regression, only evaluation.

360

### 361 **Multiple linear regression**

362 Only individual features linearly correlated with OGT ( $|r| > 0.3$ ) were used for multiple linear  
363 regression. To minimize multicollinearity, the initial regression input feature set consisted of only  
364 the feature most correlated with OGT. To this set all other correlated features were added  
365 individually, and multiple linear regressions were calculated. If the correlation between  
366 measured and predicted OGTs increased for any regression, the input feature which most  
367 increased the correlation was added to the input set. This was repeated until the correlation did  
368 not increase.

369

### 370 **Regression evaluation and prediction**

371 The test set was only used for evaluation of the multiple linear regressions, comparing the  
372 calculated and measured OGTs. Regressions were evaluated by comparing the predicted and  
373 reported OGT using the Pearson correlation coefficient and root mean square error.

374

### 375 ***De novo* OGT prediction and validation**

376 All top level genomes in Ensembl Bacteria were downloaded for each species where there was  
377 not a reported OGT in the Sauer *et al.* (2015) dataset. Taxonomic assignment and feature  
378 calculation were performed as described above. The most taxonomic specific regression  
379 available, using genomic, tRNA, ORF, and proteome features, was used to predict the OGT for  
380 each species. For these newly predicted species, Pubmed was searched using the binomial  
381 name and “optimal growth” as keywords. From the returned publications, OGTs were manually  
382 collected where available.

383

384 Analyses were carried out using custom Python scripts using Biopython 2.7.12 [95], NumPy  
385 1.13.3 [96], SciPy 1.0.0, Scikit-learn 0.19.1 [97], and Matplotlib 2.1.0 [98].

386

### 387 **Acknowledgements**

388 The authors thank Jennifer Marden for discussion and critical review of this manuscript.

389

390 This work was financially supported in part by an American Cancer Society Postdoctoral  
391 Fellowship (16-A1-00-005739 to D.B.S), the Department of Defense (W81XWH-16-1-0153 to  
392 D.B.S.), and NIH (R01-GM121994, R01-DK099023, and R01-GM093825 to D-N.W). This work  
393 was supported by the Office of the Assistant Secretary of Defense for Health Affairs, through the  
394 Peer Reviewed Cancer Research Program under Award No. W81XH-16-1-0153. Opinions,

395 interpretations, conclusions and recommendations are those of the author and are not  
396 necessarily endorsed by the Department of Defense.

397

398

## 399 References

- 400 1. Li YF, Costello JC, Holloway AK, Hahn MW. “Reverse ecology” and the power of  
401 population genomics. *Evol Int J Org Evol*. 2008;62: 2984–2994. doi:10.1111/j.1558-  
402 5646.2008.00486.x
- 403 2. Turner TL, Bourne EC, Von Wettberg EJ, Hu TT, Nuzhdin SV. Population resequencing  
404 reveals local adaptation of *Arabidopsis lyrata* to serpentine soils. *Nat Genet*. 2010;42: 260–  
405 263. doi:10.1038/ng.515
- 406 3. Hohenlohe PA, Bassham S, Etter PD, Stiffler N, Johnson EA, Cresko WA. Population  
407 genomics of parallel adaptation in threespine stickleback using sequenced RAD tags. *PLoS*  
408 *Genet*. 2010;6: e1000862. doi:10.1371/journal.pgen.1000862
- 409 4. Ellison CE, Hall C, Kowbel D, Welch J, Brem RB, Glass NL, et al. Population genomics and  
410 local adaptation in wild isolates of a model microbial eukaryote. *Proc Natl Acad Sci U S A*.  
411 2011;108: 2831–2836. doi:10.1073/pnas.1014971108
- 412 5. Kawashima T, Amano N, Koike H, Makino S, Higuchi S, Kawashima-Ohya Y, et al.  
413 Archaeal adaptation to higher temperatures revealed by genomic sequence of *Thermoplasma*  
414 *volcanium*. *Proc Natl Acad Sci U S A*. 2000;97: 14257–14262.  
415 doi:10.1073/pnas.97.26.14257
- 416 6. Galtier N, Lobry JR. Relationships between genomic G+C content, RNA secondary  
417 structures, and optimal growth temperature in prokaryotes. *J Mol Evol*. 1997;44: 632–636.
- 418 7. Hurst LD, Merchant AR. High guanine-cytosine content is not an adaptation to high  
419 temperature: a comparative analysis amongst prokaryotes. *Proc Biol Sci*. 2001;268: 493–  
420 497. doi:10.1098/rspb.2000.1397
- 421 8. Khachane AN, Timmis KN, dos Santos VAPM. Uracil content of 16S rRNA of thermophilic  
422 and psychrophilic prokaryotes correlates inversely with their optimal growth temperatures.  
423 *Nucleic Acids Res*. 2005;33: 4016–4022. doi:10.1093/nar/gki714
- 424 9. Lynn DJ, Singer GAC, Hickey DA. Synonymous codon usage is subject to selection in  
425 thermophilic bacteria. *Nucleic Acids Res*. 2002;30: 4272–4277.
- 426 10. Singer GAC, Hickey DA. Thermophilic prokaryotes have characteristic patterns of codon  
427 usage, amino acid composition and nucleotide content. *Gene*. 2003;317: 39–47.
- 428 11. Lobry JR, Chessel D. Internal correspondence analysis of codon and amino-acid usage in  
429 thermophilic bacteria. *J Appl Genet*. 2003;44: 235–261.
- 430 12. Tekaia F, Yeramian E, Dujon B. Amino acid composition of genomes, lifestyles of  
431 organisms, and evolutionary trends: a global picture with correspondence analysis. *Gene*.  
432 2002;297: 51–60.

- 433 13. Zeldovich KB, Berezovsky IN, Shakhnovich EI. Protein and DNA sequence determinants of  
434 thermophilic adaptation. *PLoS Comput Biol.* 2007;3: e5. doi:10.1371/journal.pcbi.0030005
- 435 14. Suhre K, Claverie J-M. Genomic correlates of hyperthermostability, an update. *J Biol Chem.*  
436 2003;278: 17198–17202. doi:10.1074/jbc.M301327200
- 437 15. Nguyen V, Wilson C, Hoemberger M, Stiller JB, Agafonov RV, Kutter S, et al. Evolutionary  
438 drivers of thermoadaptation in enzyme catalysis. *Science.* 2017;355: 289–294.  
439 doi:10.1126/science.aah3717
- 440 16. Perl D, Mueller U, Heinemann U, Schmid FX. Two exposed amino acid residues confer  
441 thermostability on a cold shock protein. *Nat Struct Biol.* 2000;7: 380–383.  
442 doi:10.1038/75151
- 443 17. Elliott RP. Temperature-Gradient Incubator for Determining the Temperature Range of  
444 Growth of Microorganisms. *J Bacteriol.* 1963;85: 889–894.
- 445 18. Honglin Z, Yongjun L, Haitao S. Determination of thermograms of bacterial growth and  
446 study of optimum growth temperature. *Thermochim Acta.* 1993;216: 19–23.  
447 doi:10.1016/0040-6031(93)80377-M
- 448 19. Stewart EJ. Growing unculturable bacteria. *J Bacteriol.* 2012;194: 4151–4160.  
449 doi:10.1128/JB.00345-12
- 450 20. Kunin V, Copeland A, Lapidus A, Mavromatis K, Hugenholtz P. A bioinformatician’s guide  
451 to metagenomics. *Microbiol Mol Biol Rev MMBR.* 2008;72: 557–578, Table of Contents.  
452 doi:10.1128/MMBR.00009-08
- 453 21. Rose M, Landman D, Quale J. Are community environmental surfaces near hospitals  
454 reservoirs for gram-negative nosocomial pathogens? *Am J Infect Control.* 2014;42: 346–348.  
455 doi:10.1016/j.ajic.2013.12.025
- 456 22. Cangelosi GA, Meschke JS. Dead or alive: molecular assessment of microbial viability. *Appl*  
457 *Environ Microbiol.* 2014;80: 5884–5891. doi:10.1128/AEM.01763-14
- 458 23. Hearing J, Hunter E, Rodgers L, Gething MJ, Sambrook J. Isolation of Chinese hamster  
459 ovary cell lines temperature conditional for the cell-surface expression of integral membrane  
460 glycoproteins. *J Cell Biol.* 1989;108: 339–353.
- 461 24. Hashimoto H, Moritani N, Saito TR. Comparative study on circadian rhythms of body  
462 temperature, heart rate, and locomotor activity in three species hamsters. *Exp Anim.*  
463 2004;53: 43–46.
- 464 25. Wang Q, Cen Z, Zhao J. The survival mechanisms of thermophiles at high temperatures: an  
465 angle of omics. *Physiol Bethesda Md.* 2015;30: 97–106. doi:10.1152/physiol.00066.2013

- 466 26. Sabath N, Ferrada E, Barve A, Wagner A. Growth temperature and genome size in bacteria  
467 are negatively correlated, suggesting genomic streamlining during thermal adaptation.  
468 *Genome Biol Evol.* 2013;5: 966–977. doi:10.1093/gbe/evt050
- 469 27. Li W, Zou H, Tao M. Sequences downstream of the start codon and their relations to G + C  
470 content and optimal growth temperature in prokaryotic genomes. *Antonie Van*  
471 *Leeuwenhoek.* 2007;92: 417–427. doi:10.1007/s10482-007-9170-6
- 472 28. Zheng H, Wu H. Gene-centric association analysis for the correlation between the guanine-  
473 cytosine content levels and temperature range conditions of prokaryotic species. *BMC*  
474 *Bioinformatics.* 2010;11 Suppl 11: S7. doi:10.1186/1471-2105-11-S11-S7
- 475 29. Burra PV, Kalmar L, Tompa P. Reduction in structural disorder and functional complexity in  
476 the thermal adaptation of prokaryotes. *PloS One.* 2010;5: e12069.  
477 doi:10.1371/journal.pone.0012069
- 478 30. Robinson-Rechavi M, Alibés A, Godzik A. Contribution of electrostatic interactions,  
479 compactness and quaternary structure to protein thermostability: lessons from structural  
480 genomics of *Thermotoga maritima*. *J Mol Biol.* 2006;356: 547–557.  
481 doi:10.1016/j.jmb.2005.11.065
- 482 31. Puigbò P, Pasamontes A, Garcia-Vallve S. Gaining and losing the thermophilic adaptation in  
483 prokaryotes. *Trends Genet TIG.* 2008;24: 10–14. doi:10.1016/j.tig.2007.10.005
- 484 32. Cambillau C, Claverie JM. Structural and genomic correlates of hyperthermostability. *J Biol*  
485 *Chem.* 2000;275: 32383–32386. doi:10.1074/jbc.C000497200
- 486 33. Saelensminde G, Halskau Ø, Helland R, Willassen N-P, Jonassen I. Structure-dependent  
487 relationships between growth temperature of prokaryotes and the amino acid frequency in  
488 their proteins. *Extrem Life Extreme Cond.* 2007;11: 585–596. doi:10.1007/s00792-007-  
489 0072-3
- 490 34. Kreil DP, Ouzounis CA. Identification of thermophilic species by the amino acid  
491 compositions deduced from their genomes. *Nucleic Acids Res.* 2001;29: 1608–1615.
- 492 35. Haney PJ, Badger JH, Buldak GL, Reich CI, Woese CR, Olsen GJ. Thermal adaptation  
493 analyzed by comparison of protein sequences from mesophilic and extremely thermophilic  
494 *Methanococcus* species. *Proc Natl Acad Sci U S A.* 1999;96: 3578–3583.
- 495 36. Amano N, Ohfuku Y, Suzuki M. Genomes and DNA conformation. *Biol Chem.* 1997;378:  
496 1397–1404.
- 497 37. Galtier N, Tourasse N, Gouy M. A nonhyperthermophilic common ancestor to extant life  
498 forms. *Science.* 1999;283: 220–221.
- 499 38. Yernool D, Boudker O, Jin Y, Gouaux E. Structure of a glutamate transporter homologue  
500 from *Pyrococcus horikoshii*. *Nature.* 2004;431: 811–818. doi:10.1038/nature03018

- 501 39. Jiang Y, Lee A, Chen J, Cadene M, Chait BT, MacKinnon R. Crystal structure and  
502 mechanism of a calcium-gated potassium channel. *Nature*. 2002;417: 515–522.  
503 doi:10.1038/417515a
- 504 40. Karpowich NK, Wang D-N. Assembly and mechanism of a group II ECF transporter. *Proc*  
505 *Natl Acad Sci U S A*. 2013;110: 2534–2539. doi:10.1073/pnas.1217361110
- 506 41. Acharya S, Chaudhary A. Bioprospecting thermophiles for cellulase production: a review.  
507 *Braz J Microbiol Publ Braz Soc Microbiol*. 2012;43: 844–856. doi:10.1590/S1517-  
508 83822012000300001
- 509 42. Koskinen PEP, Lay C-H, Beck SR, Tolvanen KES, Kaksonen AH, Örlygsson J, et al.  
510 Bioprospecting Thermophilic Microorganisms from Icelandic Hot Springs for Hydrogen and  
511 Ethanol Production. *Energy Fuels*. 2008;22: 134–140. doi:10.1021/ef700275w
- 512 43. Venter JC, Remington K, Heidelberg JF, Halpern AL, Rusch D, Eisen JA, et al.  
513 Environmental genome shotgun sequencing of the Sargasso Sea. *Science*. 2004;304: 66–74.  
514 doi:10.1126/science.1093857
- 515 44. Wood DE, Salzberg SL. Kraken: ultrafast metagenomic sequence classification using exact  
516 alignments. *Genome Biol*. 2014;15: R46. doi:10.1186/gb-2014-15-3-r46
- 517 45. Kim D, Song L, Breitwieser FP, Salzberg SL. Centrifuge: rapid and sensitive classification  
518 of metagenomic sequences. *Genome Res*. 2016;26: 1721–1729. doi:10.1101/gr.210641.116
- 519 46. Yang L-L, Tang S-K, Huang Y, Zhi X-Y. Low Temperature Adaptation Is Not the Opposite  
520 Process of High Temperature Adaptation in Terms of Changes in Amino Acid Composition.  
521 *Genome Biol Evol*. 2015;7: 3426–3433. doi:10.1093/gbe/evv232
- 522 47. Jensen DB, Vesth TC, Hallin PF, Pedersen AG, Ussery DW. Bayesian prediction of bacterial  
523 growth temperature range based on genome sequences. *BMC Genomics*. 2012;13 Suppl 7:  
524 S3. doi:10.1186/1471-2164-13-S7-S3
- 525 48. Taylor TJ, Vaisman II. Discrimination of thermophilic and mesophilic proteins. *BMC Struct*  
526 *Biol*. 2010;10 Suppl 1: S5. doi:10.1186/1472-6807-10-S1-S5
- 527 49. Li Y, Middaugh CR, Fang J. A novel scoring function for discriminating hyperthermophilic  
528 and mesophilic proteins with application to predicting relative thermostability of protein  
529 mutants. *BMC Bioinformatics*. 2010;11: 62. doi:10.1186/1471-2105-11-62
- 530 50. Lin H, Chen W. Prediction of thermophilic proteins using feature selection technique. *J*  
531 *Microbiol Methods*. 2011;84: 67–70. doi:10.1016/j.mimet.2010.10.013
- 532 51. Ogg CD, Patel BKC. *Thermotalea metallivorans* gen. nov., sp. nov., a thermophilic,  
533 anaerobic bacterium from the Great Artesian Basin of Australia aquifer. *Int J Syst Evol*  
534 *Microbiol*. 2009;59: 964–971. doi:10.1099/ijs.0.004218-0

- 535 52. Zhao W, Zeng X, Xiao X. *Thermococcus eurythermalis* sp. nov., a conditional piezophilic,  
536 hyperthermophilic archaeon with a wide temperature range for growth, isolated from an oil-  
537 immersed chimney in the Guaymas Basin. *Int J Syst Evol Microbiol.* 2015;65: 30–35.  
538 doi:10.1099/ijs.0.067942-0
- 539 53. Puente-Sánchez F, Sánchez-Román M, Amils R, Parro V. *Tessaracoccus lapidicaptus* sp.  
540 nov., an actinobacterium isolated from the deep subsurface of the Iberian pyrite belt. *Int J*  
541 *Syst Evol Microbiol.* 2014;64: 3546–3552. doi:10.1099/ijs.0.060038-0
- 542 54. Debnath R, Saikia R, Sarma RK, Yadav A, Bora TC, Handique PJ. Psychrotolerant  
543 antifungal *Streptomyces* isolated from Tawang, India and the shift in chitinase gene family.  
544 *Extrem Life Extreme Cond.* 2013;17: 1045–1059. doi:10.1007/s00792-013-0587-8
- 545 55. Chen Z, Feng D, Zhang B, Wang Q, Luo Y, Dong X. Proteomic insights into the temperature  
546 responses of a cold-adaptive archaeon *Methanolobus psychrophilus* R15. *Extrem Life*  
547 *Extreme Cond.* 2015;19: 249–259. doi:10.1007/s00792-014-0709-y
- 548 56. Pivovarova TA, Kondrat'eva TF, Batrakov SG, Esipov SE, Sheichenko VI, Bykova SA, et  
549 al. Phenotypic features of *Ferroplasma acidiphilum* strains Yt and Y-2. *Mikrobiologiya.*  
550 2002;71: 809–818.
- 551 57. Dsouza M, Taylor MW, Ryan J, MacKenzie A, Lagutin K, Anderson RF, et al. *Paenibacillus*  
552 *darwinianus* sp. nov., isolated from gamma-irradiated Antarctic soil. *Int J Syst Evol*  
553 *Microbiol.* 2014;64: 1406–1411. doi:10.1099/ijs.0.056697-0
- 554 58. Sukweenadhi J, Kim Y-J, Lee KJ, Koh S-C, Hoang V-A, Nguyen N-L, et al. *Paenibacillus*  
555 *yonginensis* sp. nov., a potential plant growth promoting bacterium isolated from humus soil  
556 of Yongin forest. *Antonie Van Leeuwenhoek.* 2014;106: 935–945. doi:10.1007/s10482-014-  
557 0263-8
- 558 59. Kwon YM, Yang S-H, Kwon KK, Kim S-J. *Nonlabens antarcticus* sp. nov., a psychrophilic  
559 bacterium isolated from glacier ice, and emended descriptions of *Nonlabens marinus* Park et  
560 al. 2012 and *Nonlabens agnitus* Yi and Chun 2012. *Int J Syst Evol Microbiol.* 2014;64: 400–  
561 405. doi:10.1099/ijs.0.056606-0
- 562 60. Stieglmeier M, Klingl A, Alves RJE, Rittmann SK-MR, Melcher M, Leisch N, et al.  
563 *Nitrososphaera viennensis* gen. nov., sp. nov., an aerobic and mesophilic, ammonia-  
564 oxidizing archaeon from soil and a member of the archaeal phylum *Thaumarchaeota*. *Int J*  
565 *Syst Evol Microbiol.* 2014;64: 2738–2752. doi:10.1099/ijs.0.063172-0
- 566 61. Cui H-L, Tohty D, Liu H-C, Liu S-J, Oren A, Zhou P-J. *Natronorubrum sulfidifaciens* sp.  
567 nov., an extremely haloalkaliphilic archaeon isolated from Aiding salt lake in Xin-Jiang,  
568 China. *Int J Syst Evol Microbiol.* 2007;57: 738–740. doi:10.1099/ijs.0.64651-0
- 569 62. Itoh T, Yamaguchi T, Zhou P, Takashina T. *Natronolimnobius baerhuensis* gen. nov., sp.  
570 nov. and *Natronolimnobius innermongolicus* sp. nov., novel haloalkaliphilic archaea isolated  
571 from soda lakes in Inner Mongolia, China. *Extrem Life Extreme Cond.* 2005;9: 111–116.  
572 doi:10.1007/s00792-004-0426-z



- 573 63. Xin H, Itoh T, Zhou P, Suzuki K, Nakase T. *Natronobacterium nitratireducens* sp. nov., a  
574 aloalkaliphilic archaeon isolated from a soda lake in China. *Int J Syst Evol Microbiol.*  
575 2001;51: 1825–1829. doi:10.1099/00207713-51-5-1825
- 576 64. Kern T, Fischer MA, Deppenmeier U, Schmitz RA, Rother M. *Methanosarcina flavescens*  
577 sp. nov., a methanogenic archaeon isolated from a full-scale anaerobic digester. *Int J Syst*  
578 *Evol Microbiol.* 2016;66: 1533–1538. doi:10.1099/ijsem.0.000894
- 579 65. Sun L, Toyonaga M, Ohashi A, Turlousse DM, Matsuura N, Meng X-Y, et al.  
580 *Lentimicrobium saccharophilum* gen. nov., sp. nov., a strictly anaerobic bacterium  
581 representing a new family in the phylum *Bacteroidetes*, and proposal of *Lentimicrobiaceae*  
582 fam. nov. *Int J Syst Evol Microbiol.* 2016;66: 2635–2642. doi:10.1099/ijsem.0.001103
- 583 66. Baek K, Choi A, Kang I, Lee K, Cho J-C. *Kordia antarctica* sp. nov., isolated from Antarctic  
584 seawater. *Int J Syst Evol Microbiol.* 2013;63: 3617–3622. doi:10.1099/ijms.0.052738-0
- 585 67. Surendra V, Bhawana P, Suresh K, Srinivas TNR, Kumar PA. *Imtechella halotolerans* gen.  
586 nov., sp. nov., a member of the family *Flavobacteriaceae* isolated from estuarine water. *Int J*  
587 *Syst Evol Microbiol.* 2012;62: 2624–2630. doi:10.1099/ijms.0.038356-0
- 588 68. Birkenbihl RP, Neef K, Prangishvili D, Kemper B. Holliday junction resolving enzymes of  
589 archaeal viruses SIRV1 and SIRV2. *J Mol Biol.* 2001;309: 1067–1076.  
590 doi:10.1006/jmbi.2001.4761
- 591 69. Castillo AM, Gutiérrez MC, Kamekura M, Ma Y, Cowan DA, Jones BE, et al. *Halovivax*  
592 *asiaticus* gen. nov., sp. nov., a novel extremely halophilic archaeon isolated from Inner  
593 Mongolia, China. *Int J Syst Evol Microbiol.* 2006;56: 765–770. doi:10.1099/ijms.0.63954-0
- 594 70. Gutiérrez MC, Castillo AM, Kamekura M, Ventosa A. *Haloterrigena salina* sp. nov., an  
595 extremely halophilic archaeon isolated from a salt lake. *Int J Syst Evol Microbiol.* 2008;58:  
596 2880–2884. doi:10.1099/ijms.0.2008/001602-0
- 597 71. Cui H-L, Tohty D, Zhou P-J, Liu S-J. *Haloterrigena longa* sp. nov. and *Haloterrigena*  
598 *limicola* sp. nov., extremely halophilic archaea isolated from a salt lake. *Int J Syst Evol*  
599 *Microbiol.* 2006;56: 1837–1840. doi:10.1099/ijms.0.64372-0
- 600 72. Gutiérrez MC, Castillo AM, Pagaling E, Heaphy S, Kamekura M, Xue Y, et al. *Halorubrum*  
601 *kocurii* sp. nov., an archaeon isolated from a saline lake. *Int J Syst Evol Microbiol.* 2008;58:  
602 2031–2035. doi:10.1099/ijms.0.65840-0
- 603 73. Hong H, Kim S-J, Min U-G, Lee Y-J, Kim S-G, Jung M-Y, et al. *Geosporobacter*  
604 *ferrireducens* sp. nov., an anaerobic iron-reducing bacterium isolated from an oil-  
605 contaminated site. *Antonie Van Leeuwenhoek.* 2015;107: 971–977. doi:10.1007/s10482-  
606 015-0389-3
- 607 74. Söderholm H, Derman Y, Lindström M, Korkeala H. Functional *csdA* is needed for effective  
608 adaptation and initiation of growth of *Clostridium botulinum* ATCC 3502 at suboptimal  
609 temperature. *Int J Food Microbiol.* 2015;208: 51–57. doi:10.1016/j.ijfoodmicro.2015.05.013

- 610 75. Davidova IA, Wawrik B, Callaghan AV, Duncan K, Marks CR, Suflita JM.  
611 *Dethiosulfatarculus sandiegensis* gen. nov., sp. nov., isolated from a methanogenic paraffin-  
612 degrading enrichment culture and emended description of the family *Desulfarculaceae*. Int J  
613 Syst Evol Microbiol. 2016;66: 1242–1248. doi:10.1099/ijsem.0.000864
- 614 76. Abin CA, Hollibaugh JT. *Desulfuribacillus stibiiarsenatis* sp. nov., an obligately anaerobic,  
615 dissimilatory antimonate- and arsenate-reducing bacterium isolated from anoxic sediments,  
616 and emended description of the genus *Desulfuribacillus*. Int J Syst Evol Microbiol. 2017;67:  
617 1011–1017. doi:10.1099/ijsem.0.001732
- 618 77. An TT, Picardal FW. *Desulfocarbo indianensis* gen. nov., sp. nov., a benzoate-oxidizing,  
619 sulfate-reducing bacterium isolated from water extracted from a coal bed. Int J Syst Evol  
620 Microbiol. 2014;64: 2907–2914. doi:10.1099/ijsem.0.064873-0
- 621 78. Hahnke S, Langer T, Koeck DE, Klocke M. Description of *Proteiniphilum*  
622 *saccharofermentans* sp. nov., *Petrimonas mucosasp.* nov. and *Fermentimonas caenicolagen.*  
623 nov., sp. nov., isolated from mesophilic laboratory-scale biogas reactors, and emended  
624 description of the genus *Proteiniphilum*. Int J Syst Evol Microbiol. 2016;66: 1466–1475.  
625 doi:10.1099/ijsem.0.000902
- 626 79. Hahnke S, Striesow J, Elvert M, Mollar XP, Klocke M. *Clostridium bornimense* sp. nov.,  
627 isolated from a mesophilic, two-phase, laboratory-scale biogas reactor. Int J Syst Evol  
628 Microbiol. 2014;64: 2792–2797. doi:10.1099/ijsem.0.059691-0
- 629 80. Xu Y, Zhou P, Tian X. Characterization of two novel haloalkaliphilic archaea  
630 *Natronorubrum bangense* gen. nov., sp. nov. and *Natronorubrum tibetense* gen. nov., sp.  
631 nov. Int J Syst Bacteriol. 1999;49 Pt 1: 261–266. doi:10.1099/00207713-49-1-261
- 632 81. Yang S-H, Seo H-S, Woo J-H, Oh H-M, Jang H, Lee J-H, et al. *Carboxylicivirga* gen. nov.  
633 in the family *Marinilabiliaceae* with two novel species, *Carboxylicivirga mesophila* sp. nov.  
634 and *Carboxylicivirga taeansensis* sp. nov., and reclassification of *Cytophaga fermentans* as  
635 *Saccharicrinis fermentans* gen. nov., comb. nov. Int J Syst Evol Microbiol. 2014;64: 1351–  
636 1358. doi:10.1099/ijsem.0.053462-0
- 637 82. Lee G-H, Rhee M-S, Chang D-H, Kwon KK, Bae KS, Yang S-H, et al. *Bacillus*  
638 *solimangrovi* sp. nov., isolated from mangrove soil. Int J Syst Evol Microbiol. 2014;64:  
639 1622–1628. doi:10.1099/ijsem.0.058230-0
- 640 83. Dunlap CA, Kwon S-W, Rooney AP, Kim S-J. *Bacillus paralicheniformis* sp. nov., isolated  
641 from fermented soybean paste. Int J Syst Evol Microbiol. 2015;65: 3487–3492.  
642 doi:10.1099/ijsem.0.000441
- 643 84. Dunlap CA, Saunders LP, Schisler DA, Leathers TD, Naeem N, Cohan FM, et al. *Bacillus*  
644 *nakamurai* sp. nov., a black-pigment-producing strain. Int J Syst Evol Microbiol. 2016;66:  
645 2987–2991. doi:10.1099/ijsem.0.001135

- 646 85. Kim S-J, Dunlap CA, Kwon S-W, Rooney AP. *Bacillus glycinifermentans* sp. nov., isolated  
647 from fermented soybean paste. *Int J Syst Evol Microbiol.* 2015;65: 3586–3590.  
648 doi:10.1099/ijsem.0.000462
- 649 86. Shi W, Takano T, Liu S. *Anditalea andensis* gen. nov., sp. nov., an alkaliphilic, halotolerant  
650 bacterium isolated from extreme alkali-saline soil. *Antonie Van Leeuwenhoek.* 2012;102:  
651 703–710. doi:10.1007/s10482-012-9770-7
- 652 87. Chu Y, Zhu Y, Chen Y, Li W, Zhang Z, Liu D, et al. aKMT Catalyzes Extensive Protein  
653 Lysine Methylation in the Hyperthermophilic *Archaeon Sulfolobus islandicus* but is  
654 Dispensable for the Growth of the Organism. *Mol Cell Proteomics MCP.* 2016;15: 2908–  
655 2923. doi:10.1074/mcp.M115.057778
- 656 88. Sauer DB, Karpowich NK, Song JM, Wang D-N. Rapid Bioinformatic Identification of  
657 Thermostabilizing Mutations. *Biophys J.* 2015;109: 1420–1428.  
658 doi:10.1016/j.bpj.2015.07.026
- 659 89. Benson DA, Cavanaugh M, Clark K, Karsch-Mizrachi I, Lipman DJ, Ostell J, et al.  
660 GenBank. *Nucleic Acids Res.* 2017;45: D37–D42. doi:10.1093/nar/gkw1070
- 661 90. Kersey PJ, Allen JE, Armean I, Boddu S, Bolt BJ, Carvalho-Silva D, et al. Ensembl  
662 Genomes 2016: more genomes, more complexity. *Nucleic Acids Res.* 2016;44: D574–580.  
663 doi:10.1093/nar/gkv1209
- 664 91. Lowe TM, Eddy SR. tRNAscan-SE: a program for improved detection of transfer RNA  
665 genes in genomic sequence. *Nucleic Acids Res.* 1997;25: 955–964.
- 666 92. Seemann T. Barrnap [Internet]. Available: <https://github.com/tseemann/barrnap>
- 667 93. Quinlan AR, Hall IM. BEDTools: a flexible suite of utilities for comparing genomic features.  
668 *Bioinforma Oxf Engl.* 2010;26: 841–842. doi:10.1093/bioinformatics/btq033
- 669 94. Besemer J, Lomsadze A, Borodovsky M. GeneMarkS: a self-training method for prediction  
670 of gene starts in microbial genomes. Implications for finding sequence motifs in regulatory  
671 regions. *Nucleic Acids Res.* 2001;29: 2607–2618.
- 672 95. Cock PJA, Antao T, Chang JT, Chapman BA, Cox CJ, Dalke A, et al. Biopython: freely  
673 available Python tools for computational molecular biology and bioinformatics. *Bioinforma*  
674 *Oxf Engl.* 2009;25: 1422–1423. doi:10.1093/bioinformatics/btp163
- 675 96. van der Walt S, Colbert SC, Varoquaux G. The NumPy Array: A Structure for Efficient  
676 Numerical Computation. *Comput Sci Eng.* 2011;13: 22–30. doi:10.1109/MCSE.2011.37
- 677 97. Pedregosa F, Varoquaux G, Gramfort A, Michel V, Thirion B, Grisel O, et al. Scikit-learn:  
678 Machine Learning in Python. *J Mach Learn Res.* 2011;12: 2825–2830.
- 679 98. Hunter JD. Matplotlib: A 2D Graphics Environment. *Comput Sci Eng.* 2007;9: 90–95.  
680 doi:10.1109/MCSE.2007.55

681 **Supporting Information Captions**

682  
683 Figure S1. The genomes available are dominated by mesophiles, bacteria, and repetitively  
684 sequenced organisms.

685  
686 Figure S2. Features are often highly associated.

687  
688 Figure S3. Using only genomic sequence features is poorly predictive of OGT.

689  
690 Figure S4. Phylum specific regressions are often strongly predictive.

691  
692 Figure S5. Class specific regressions can be strongly predictive.

693  
694 Figure S6. Bioinformatic classification allows for accurate OGT prediction.

695  
696 Figure S7. Genome size is not necessary for OGT prediction accuracy.

697  
698 Figure S8. Excluding psychrophiles improves OGT prediction.

699  
700 Figure S9. OGT prediction validated using previously unknown species-OGT values.

701  
702 Equation S1. Features and coefficients for the prediction of the OGT for a prokaryote.

703  
704 Equation S2. Features and coefficients for the prediction of the OGT for an Archaea.

705  
706 Equation S3. Features and coefficients for the prediction of the OGT for a Bacterium.

707  
708 Table S1. Correlation of features to OGT.

709  
710 Table S2. *De novo* predicted OGT for species without a measured OGT in Sauer *et al.* 2015
